# Supplementary material for: Photonic crystal-integrated thermo-responsive smart windows with multicolor and enhanced NIR shielding
Source: Royal Society of Chemistry journal article supplement (doi:10.1039/d5ta02190a), 2025-01-01
Supplement: d5ta02190a1.pdf [file d5ta02190a1.pdf]

## Supporting Information

### **Photonic Crystal-Integrated Thermo-Responsive Smart Windows with Multicolor and Enhanced NIR Shielding**

*Chunhao Li<sup>1</sup>, Aojue Ke<sup>1</sup>, Huifang Shen<sup>1\*</sup>, Xinya Zhang<sup>1\*</sup>*

<sup>1</sup>School of Chemistry and Chemical Engineering, Guangdong Provincial Key Lab of Green Chemical Product Technology, South China University of Technology, Guangzhou, 510640, P.R. China

\* Corresponding author

E-mail: cehfshen@scut.edu.cn; cexyzh@scut.edu.cn

This file includes Supporting Figure S1-S10, Supporting Table S1.

## Supporting Figures

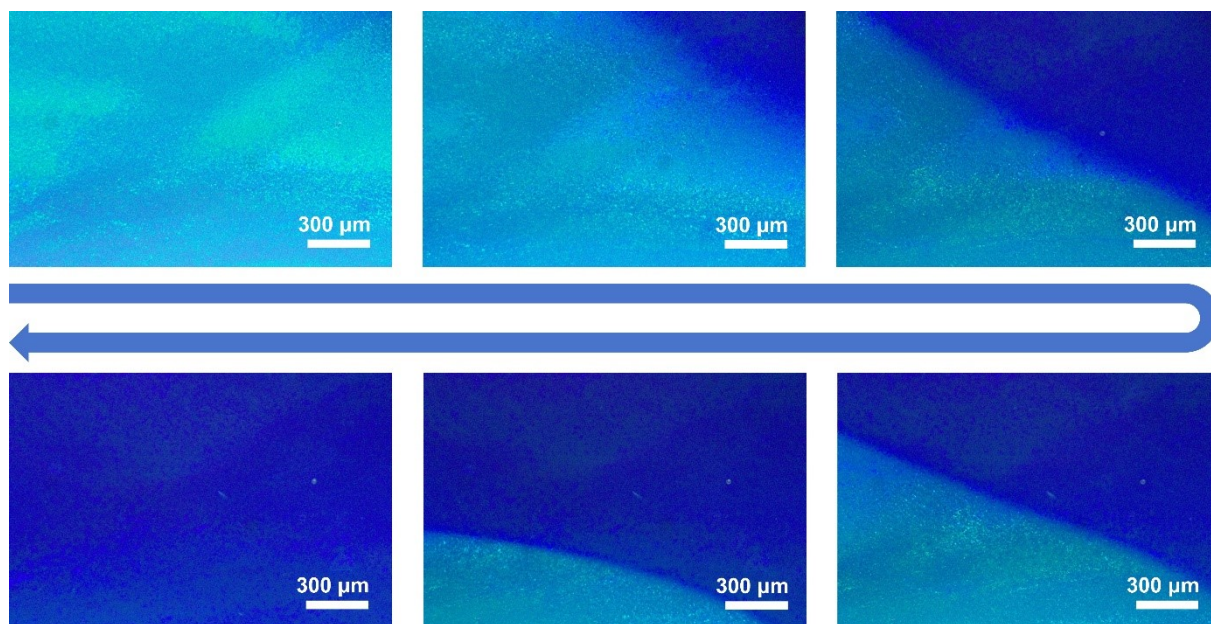

**Figure S1.** The self-assembly process of PS LCCs.

**a**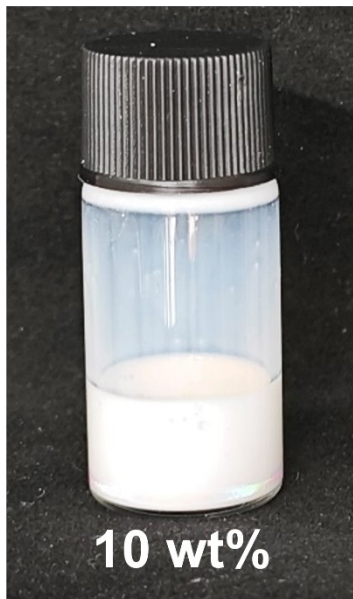**b**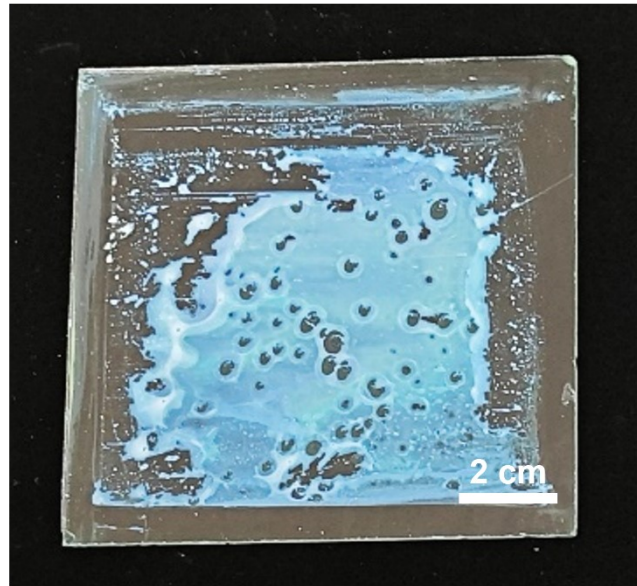

**Figure S2.** a) Digital image of 10 wt% PS microsphere dispersion. b) Digital image of photonic crystals assembled by 10 wt% PS microsphere dispersion.

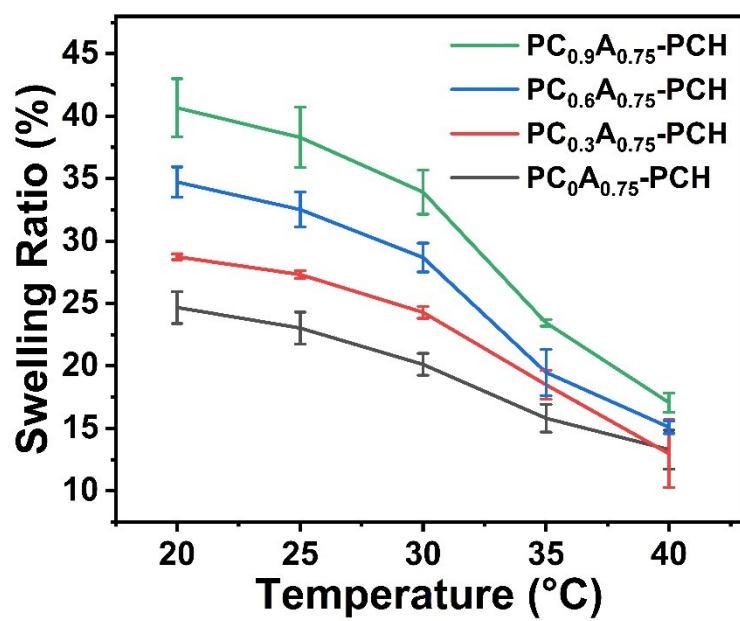

**Figure S3.** Equilibrium swelling ratio of PNIPAm/CMC/ATO-PCH at varying temperatures.

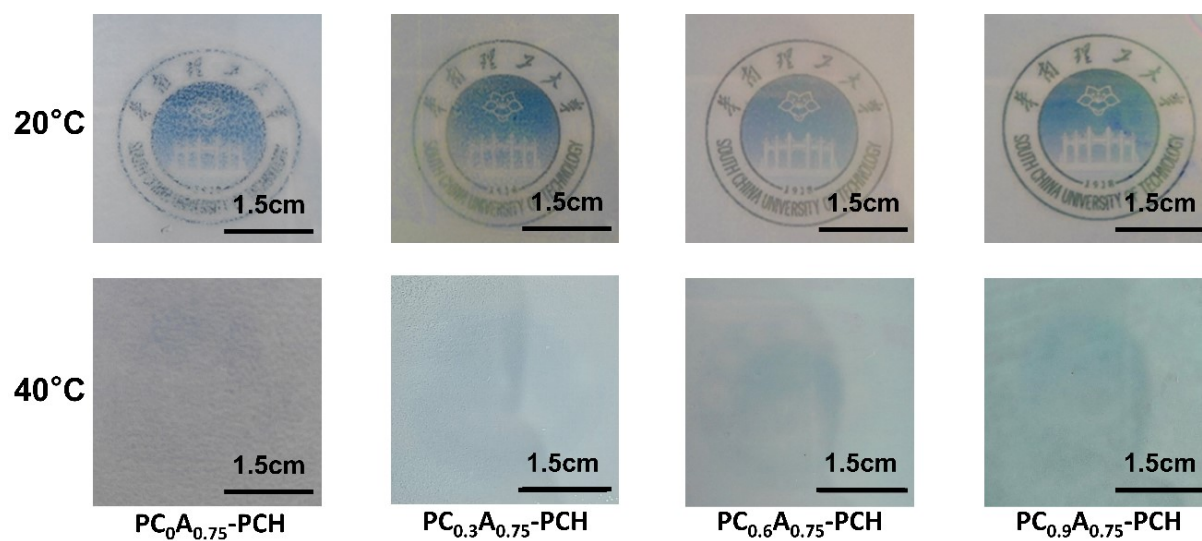

**Figure S4.** Digital images of PNIPAm/CMC/ATO-PCH at various temperatures.

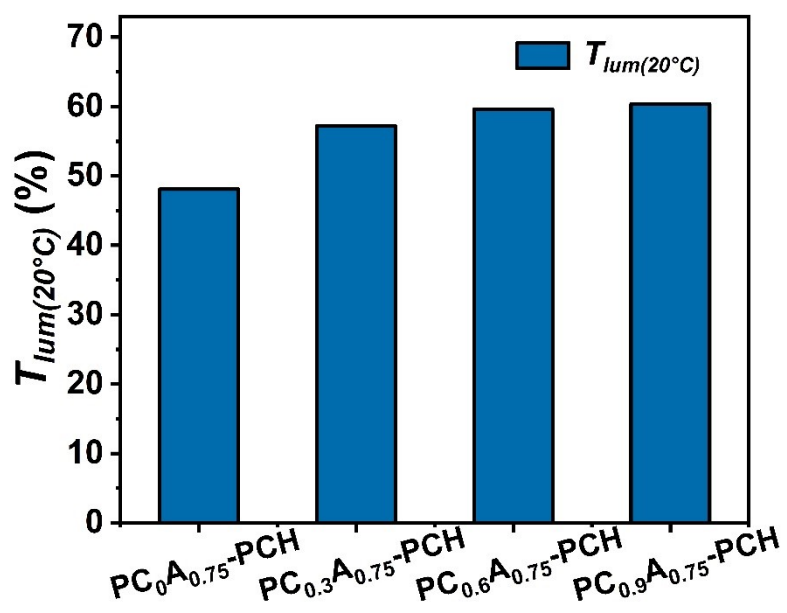

**Figure S5.** Visible light transmittance of the PNIPAm/CMC/ATO-PCH at 20°C.

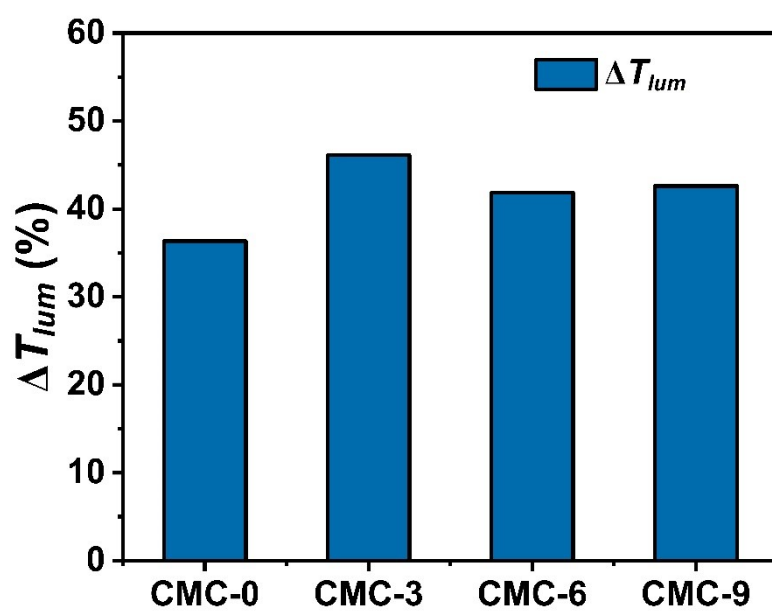

**Figure S6.** Visible modulation performance of the PNIPAm/CMC/ATO-PCH.

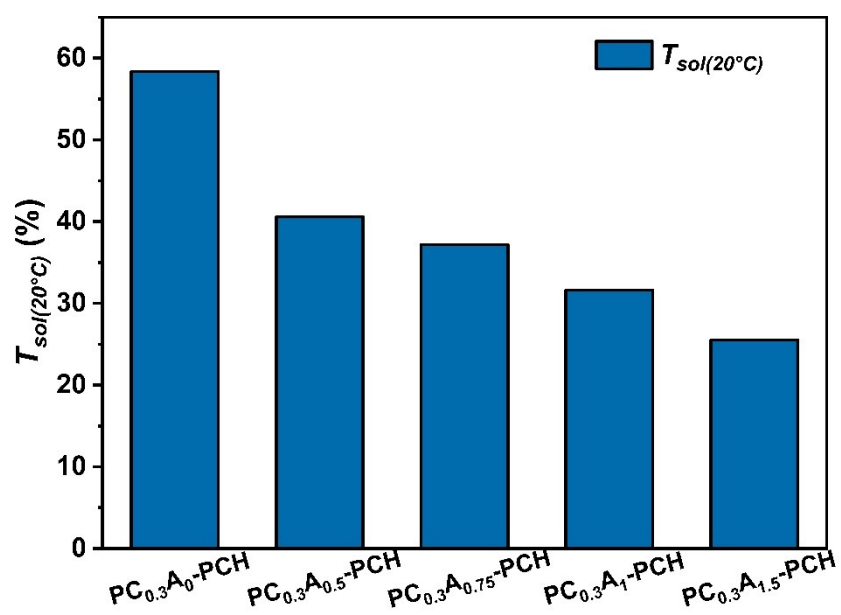

**Figure S7.** Solar light transmittance of the PNIPAm/CMC/ATO-PCH at 20°C.



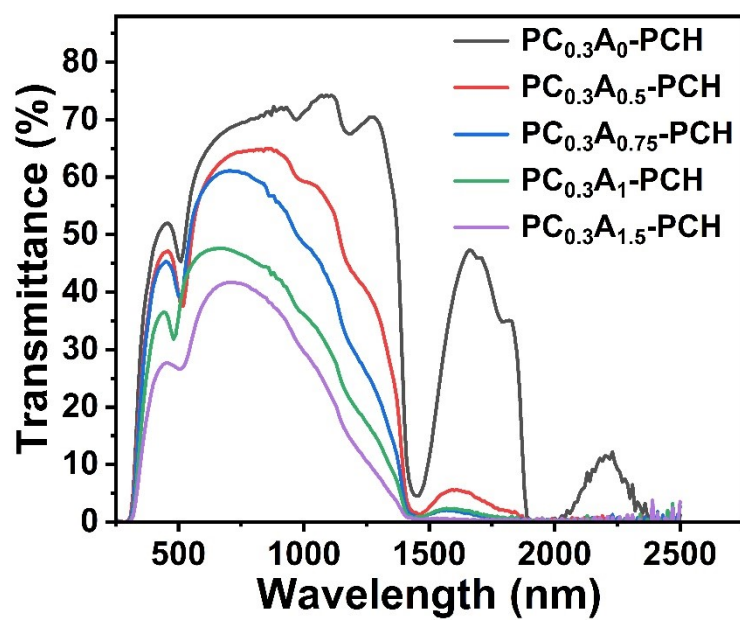

**Figure S8.** UV–Vis-NIR spectra of the PNIPAm/CMC/ATO-PCH at 20°C.

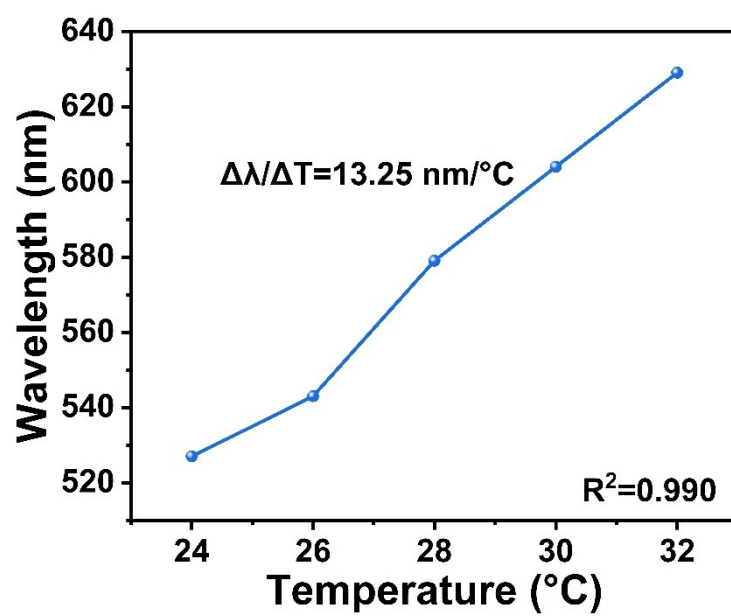

**Figure S9.** Thermochromic sensitivity of the PNIPAm/CMC/ATO-PCH.

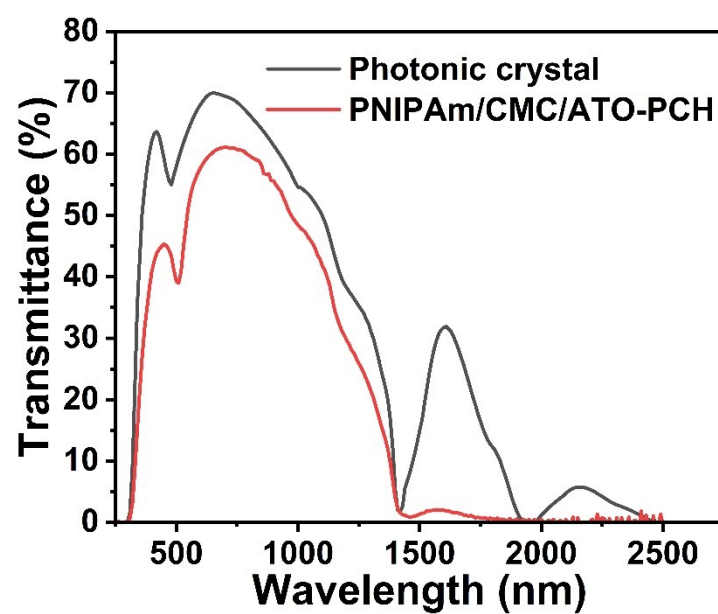

**Figure S10.** UV–Vis-NIR spectra of the Photonic crystal and the PNIPAm/CMC/ATO-PCH.

## Supporting Tables

**Table S1.** The formulation for fabricating various PNIPAm/CMC/ATO-PCH.

| Samples | NIPAm<br>[g] | CMC<br>[g] | BIS<br>[g] | ATO<br>(50 wt%)<br>[g] | APS<br>[g] | TEMED<br>[μL] | H <sub>2</sub> O<br>[g] | Named                                    |
|---------|--------------|------------|------------|------------------------|------------|---------------|-------------------------|------------------------------------------|
| 1       | 1            | 0          | 0.01       | 0.15                   | 0.02       | 10            | 10                      | PC <sub>0</sub> A <sub>0.75</sub> -PCH   |
| 2       | 1            | 0.03       | 0.01       | 0.15                   | 0.02       | 10            | 10                      | PC <sub>0.3</sub> A <sub>0.75</sub> -PCH |
| 3       | 1            | 0.06       | 0.01       | 0.15                   | 0.02       | 10            | 10                      | PC <sub>0.6</sub> A <sub>0.75</sub> -PCH |
| 4       | 1            | 0.09       | 0.01       | 0.15                   | 0.02       | 10            | 10                      | PC <sub>0.9</sub> A <sub>0.75</sub> -PCH |
| 5       | 1            | 0.03       | 0.01       | 0                      | 0.02       | 10            | 10                      | PC <sub>0.3</sub> A <sub>0</sub> -PCH    |
| 6       | 1            | 0.03       | 0.01       | 0.1                    | 0.02       | 10            | 10                      | PC <sub>0.3</sub> A <sub>0.5</sub> -PCH  |
| 7       | 1            | 0.03       | 0.01       | 0.15                   | 0.02       | 10            | 10                      | PC <sub>0.3</sub> A <sub>0.75</sub> -PCH |
| 8       | 1            | 0.03       | 0.01       | 0.25                   | 0.02       | 10            | 10                      | PC <sub>0.3</sub> A <sub>1</sub> -PCH    |
| 9       | 1            | 0.03       | 0.01       | 0.3                    | 0.02       | 10            | 10                      | PC <sub>0.3</sub> A <sub>1.5</sub> -PCH  |
